# Supplementary material for: Extraction of amplifiable DNA from embalmed human cadaver tissue
Source: PubMed Central journal article supplement (PMC5729266; doi:10.1186/s13104-017-3066-y), 2017-12-13
Supplement: 13104_2017_3066_MOESM1_ESM.pdf [file 13104_2017_3066_MOESM1_ESM.pdf]

**Supplemental Table 1.**

| <b>Variable</b>        | <b>Description</b>                                                                               | <b>Results<br/>ng/<math>\mu</math>l (260/280)</b> | <b>Electrophoresis<br/>Descriptive Results</b>           |
|------------------------|--------------------------------------------------------------------------------------------------|---------------------------------------------------|----------------------------------------------------------|
| PBS washes             | Three washes of tissues following homogenization and prior to heat treatment to remove fixative. | 45.4 (1.75)                                       | PBS washes yielded $\geq 500$ bp DNA species             |
| Temperature            | Incubation of tissue following homogenization to enhance protein removal.                        |                                                   | 95°C treatment yielded $\geq 500$ bp DNA species         |
| 95°C                   |                                                                                                  | 65.42 (1.82)                                      | DNA $\geq 500$ bp                                        |
| 55°C                   |                                                                                                  | 15.65 (1.58)                                      | DNA $\geq 500$ bp                                        |
| -80°C                  |                                                                                                  | 0.015 (1.56)                                      | No bands                                                 |
| Proteinase K Digestion | Digestion at 55°C for 1hr following tissue homogenization to enhance protein removal.            |                                                   | Proteinase K digestions yielded no discernable DNA bands |
| 0.2 $\mu$ g/ $\mu$ l   |                                                                                                  | 0.45 (1.28)                                       | No bands                                                 |
| 2.0 $\mu$ g/ $\mu$ l   |                                                                                                  | 0.42 (1.23)                                       | No bands                                                 |
| 20.0 $\mu$ g/ $\mu$ l  |                                                                                                  | 0.55 (1.68)                                       | No bands                                                 |
